# Supplementary material for: Warming accelerates belowground litter turnover in salt marshes – insights from a Tea Bag Index study
Source: Copernicus journal article supplement (doi:10.5194/bg-20-1925-2023), 2023-05-24
Supplement: Supplementary file 1 [file bg-20-1925-2023-supplement.pdf]

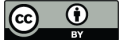

*Supplement of*

## **Warming accelerates belowground litter turnover in salt marshes – insights from a Tea Bag Index study**

**Hao Tang et al.**

*Correspondence to:* Peter Mueller ([mueller.p@uni-muenster.de](mailto:mueller.p@uni-muenster.de))

The copyright of individual parts of the supplement might differ from the article licence.

**Table S1 Mean soil temperature differences (°C) between ambient and warmed treatments in year 1 and year 2.**

| Year          | Treatment | Pioneer zone | Low marsh | High marsh |
|---------------|-----------|--------------|-----------|------------|
| Year 1 (2018) | + 1.5°C   | 1.21         | 0.99      | 1.66       |
|               | + 3°C     | 1.61         | 2.08      | 2.81       |
| Year 2 (2019) | + 1.5°C   | 1.82         | 1.26      | 1.43       |
|               | + 3°C     | 2.81         | 2.06      | 2.07       |

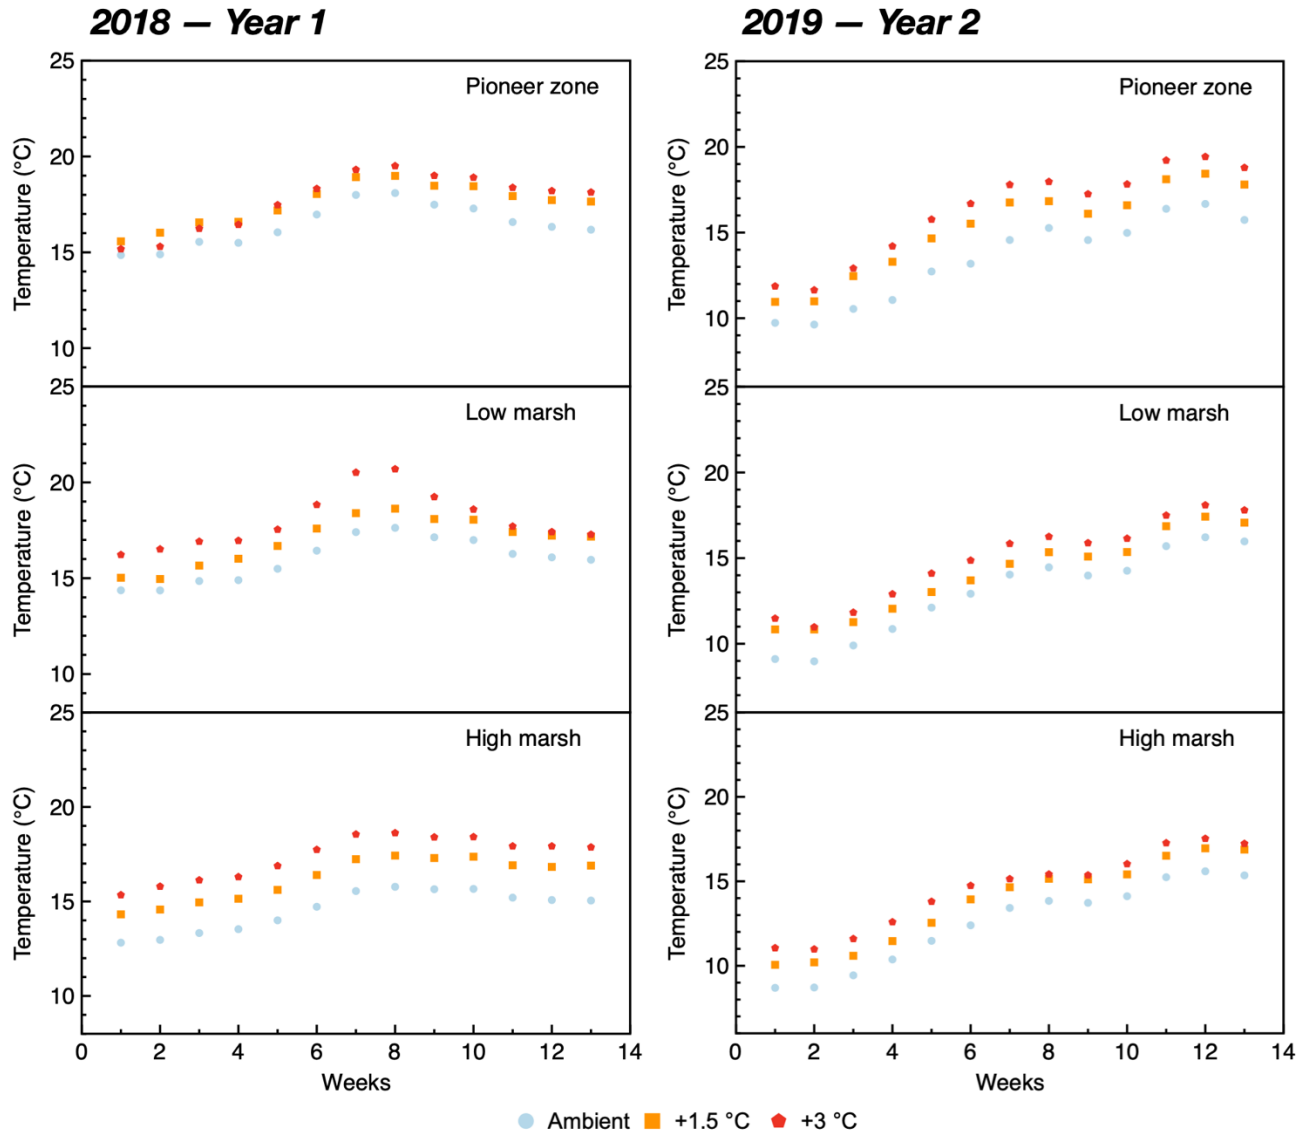

Figure S1 Soil temperature across marsh zones and warming treatments during the incubation phases of year 1 and year 2. Shown are means across all soil depths.
